# Supplementary material for: Worsening of Preexisting Psychiatric Conditions During the COVID-19 Pandemic
Source: PubMed Central journal article supplement (PMC7772353; doi:10.3389/fpsyt.2020.581426), 2020-12-16
Supplement: Appendix_2.pdf [file Appendix_2.pdf]

English questionnaire: <https://forms.gle/Pcw4C2qz8H5GDZKW9>

Arabic questionnaire: <https://forms.gle/PRb226Uy1w9bTSMt8>

Bosnian questionnaire: <https://forms.gle/S5mWCghkBuWBUtGS8>

French questionnaire: <https://forms.gle/3qLGAJ3dXkj5Njf7>

German questionnaire: <https://forms.gle/ZbraKp7LaLkTjh7N7>

Greek questionnaire: <https://forms.gle/f1JSsXprYY2SceaR8>

Italian questionnaire: <https://forms.gle/U2NYa9aS9d7rGYao9>

Persian questionnaire: <https://forms.gle/jTMsRdkuuZfChNeC9>

Polish questionnaire: <https://forms.gle/KqD8mkdRfMGNQTwn9>

Spanish questionnaire: <https://forms.gle/cN78PPbs88mhnTsq7>

Turkish questionnaire: <https://forms.gle/mpvHmN1cs663C4F47>
